# Supplementary material for: Chemoselective derivatisation and ultrahigh resolution mass spectrometry for the determination of hydroxyl functional groups within complex bio-oils
Source: RSC Adv. 2023 Jun 12;13(26):17727–41. doi: 10.1039/d3ra02779a (PMC10259504; doi:10.1039/d3ra02779a)
Supplement: RA-013-D3RA02779A-s001 [file RA-013-D3RA02779A-s001.xlsx]

## Sheet: Sheet1
					RT (min)	Area	Area(%)	m/z	Assignment	Intensity
	Ph-1	2-methoxyphenol	124.052	C7H8O2	24.985	16695664		125.06	C7H8O2[H]	4932382
MeOH	Ph-1MeOH	2-methoxyphenol	124.052	C7H8O2	24.981	16429199	99.6826	125.06	C7H8O2[H]	5211760
MeOH	Ph-1MeOH	2-methoxyphenyl acetate	166.063	C9H10O3	27.038	52314	0.31741	167.071	C9H10O3[H]	24522
Acetone	Ph-1 Acetone	2-methoxyphenol	124.052	C7H8O2	24.688	108092136	38.695	125.06	C7H8O2[H]	17383306
Acetone	Ph-1 Acetone	2-methoxyphenyl acetate	166.063	C9H10O3	26.765	171251552	61.305	167.07	C9H10O3[H]	17894692
DMSO	Ph-1 DMSO	2-methoxyphenol	124.052	C7H8O2	24.699	13361283	2.30396	125.06	C7H8O2[H]	3330004
DMSO	Ph-1 DMSO	2-methoxyphenyl acetate	166.063	C9H10O3	26.743	37213280	6.41689	167.07	C9H10O3[H]	8376980
DMSO	Ph-1 DMSO				20.326	11580473	1.99688	153.091	C9H12O2[H]	290850
DMSO	Ph-1 DMSO				21.926	18396906	3.17228	139.075	C8H10O2[H]	4291128
DMSO	Ph-1 DMSO				24.936	7066143	1.21845	139.075	C8H10O2[H]	1702118
DMSO	Ph-1 DMSO				31.177	21163104	3.64927	137.06	C8H8O2[H]	4980456
DMSO	Ph-1 DMSO				32.063	43294788	7.46556	137.06	C8H8O2[H]	10474368
DMSO	Ph-1 DMSO				37.241	171538640	29.5794	137.06	C8H8O2[H]	18042608
DMSO	Ph-1 DMSO				40.849	105632952	18.2149	245.067	C11H16O2S2[H]	18589792
DMSO	Ph-1 DMSO				48.018	150679360	25.9825	197.063	C10H12O2S[H]	16692988
	Ph-2	2,4-dimethylphenol	122.073	C8H10O	29.334	19935132		123.081	C8H10O[H]	5845068
MeOH	Ph-2 MeOH	2,4-dimethylphenol	122.073	C8H10O	29.318	26840806	99.9372	123.081	C8H10O[H]	7818474
MeOH	Ph-2 MeOH	2,4-dimethylphenyl acetate	164.084	C10H12O2	23.572	16863.6	0.0627888	165.091	C10H12O2[H]	4404
Acetone	Ph-2 Acetone	2,4-dimethylphenol	122.073	C8H10O	29.056	140747822	82.6502	123.081	C8H10O[H]	20327986
Acetone	Ph-2 Acetone	2,4-dimethylphenyl acetate	164.084	C10H12O2	23.333	29545606	17.3498	165.092	C10H12O2[H]	8591828
DMSO	Ph-2 DMSO	2,4-dimethylphenol	122.073	C8H10O	29.243	155061	7.96771	123.08	C8H10O[H]	67600
DMSO	Ph-2 DMSO	2,4-dimethylphenyl acetate	164.084	C10H12O2	23.502	30558	1.5702	165.091	C10H12O2[H]	11450
DMSO	Ph-2 DMSO				26.609	499725	25.6781	135.08	C9H10O[H]	185874
DMSO	Ph-2 DMSO				33.895	386230	19.8462	135.08	C9H10O[H]	138690
DMSO	Ph-2 DMSO				38.457	380842	19.5693	243.087	C12H18OS2[H]	80230
DMSO	Ph-2 DMSO				38.891	393185	20.2036	243.087	C12H18OS2[H]	137582
DMSO	Ph-2 DMSO				41.029	100516	5.16495	243.087	C12H18OS2[H]	37956
	Ph-3	o-cresol	108.058	C7H8O	27.858	6336792		109.065	C7H8O[H]	1706136
MeOH	Ph-3 MeOH	o-cresol	108.058	C7H8O	27.834	6.87066e+06	99.9156	109.065	C7H8O[H]	1913158
MeOH	Ph-3 MeOH	o-tolyl acetate	150.068	C9H10O2	21.194	5805.94	0.084432	151.075	C9H10O2[H]	1598
Acetone	Ph-3 Acetone	o-cresol	108.058	C7H8O	27.56	94437464	86.4941	109.065	C7H8O[H]	18163236
Acetone	Ph-3 Acetone	o-tolyl acetate	150.068	C9H10O2	20.964	14746281	13.5059	109.065	C7H8O[H]	4051714
DMSO	Ph-3 DMSO	o-cresol	108.058	C7H8O	27.761	49971.6	2.86504	109.065	C7H8O[H]	16674
DMSO	Ph-3 DMSO	o-tolyl acetate	150.068	C9H10O2	21.129	9750.5	0.559029	151.075	C9H10O2[H]	6814
DMSO	Ph-3 DMSO				24.36	187386	10.7435	121.065	C8H8O[H]	58590
DMSO	Ph-3 DMSO				32.297	289568	16.6019	121.065	C8H8O[H]	98082
DMSO	Ph-3 DMSO				37.629	443501	25.4274	229.071	C11H16OS2[H]	181086
DMSO	Ph-3 DMSO				38.737	458629	26.2947	229.071	C11H16OS2[H]	164924
DMSO	Ph-3 DMSO				44.702	305379	17.5084	181.068	C10H12OS[H]	119048
	Ph-4	4-ethylphenol	122.073	C8H10O	30.84	132843144		123.08	C8H10O[H]	20289322
MeOH	Ph-4 MeOH	4-ethylphenol	122.073	C8H10O	30.838	123347960	99.538	123.08	C8H10O[H]	20268320
MeOH	Ph-4 MeOH	4-ethylphenyl acetate	164.084	C10H12O2	23.898	572569	0.462045	165.091	C10H12O2[H]	335962
Acetone	Ph-4 Acetone	4-ethylphenol	122.073	C8H10O	30.843	138456973	81.622	123.08	C8H10O[H]	20324348
Acetone	Ph-4 Acetone	4-ethylphenyl acetate	164.084	C10H12O2	23.906	31174934	18.378	165.091	C10H12O2[H]	7268866
DMSO	Ph-4 DMSO	4-ethylphenol	122.073	C8H10O	30.83	176014768	81.6948	123.08	C8H10O[H]	20329806
DMSO	Ph-4 DMSO	4-ethylphenyl acetate	164.084	C10H12O2	23.829	35099852	16.2911	165.091	C10H12O2[H]	6265764
DMSO	Ph-4 DMSO				37.307	4339448	2.01409	135.081	C9H10O[H]	1313948
	Ct-5	hydroquinone	110.037	C6H6O2	44.358	5251553		111.044	C6H6O2[H]	1617942
MeOH	Ct-5 MeOH	hydroquinone	110.037	C6H6O2	44.33	5294834	97.6117	111.044	C6H6O2[H]	1684434
MeOH	Ct-5 MeOH	4-hydroxyphenyl acetate	152.047	C8H8O3	40.868	129552	2.38833	153.055	C8H8O3[H]	40596
MeOH	Ct-5 MeOH	1,4-phenylene diacetate	194.058	C10H10O4	NA
Acetone	Ct-5 Acetone	hydroquinone	110.037	C6H6O2	44.03	55322252	34.6433	111.044	C6H6O2[H]	112240
Acetone	Ct-5 Acetone	4-hydroxyphenyl acetate	152.047	C8H8O3	40.592	62382276	39.0643	153.054	C8H8O3[H]	17074826
Acetone	Ct-5 Acetone	1,4-phenylene diacetate	194.058	C10H10O4	33.121	41986616	26.2924	195.065	C10H10O4[H]	12274290
DMSO	Ct-5 DMSO	hydroquinone	110.037	C6H6O2	44.016	4097986	11.2267	111.044	C6H6O2[H]	1974256
DMSO	Ct-5 DMSO	4-hydroxyphenyl acetate	152.047	C8H8O3	40.57	17228622	47.199	153.054	C8H8O3[H]	4599900
DMSO	Ct-5 DMSO	1,4-phenylene diacetate	194.058	C10H10O4	33.102	3289962	9.01308	195.065	C10H10O4[H]	921614
DMSO	Ct-5 DMSO				43.456	11885530	32.5612	139.039	C7H6O3[H]	3441917
	Ct-6	1-(2,5-dihydroxyphenyl)propan-1-one	166.063	C9H10O3	45.748	95535688		167.07	C9H10O3[H]	19123368
MeOH	Ct-6 MeOH	1-(2,5-dihydroxyphenyl)propan-1-one	166.063	C9H10O3	45.72	98671936	97.0966	167.07	C9H10O3[H]	18957902
MeOH	Ct-6 MeOH	4-hydroxy-3-propionylphenyl acetate	208.074	C11H12O4	36.418	2950552	2.90344	209.081	C11H12O4[H]	1103112
Acetone	Ct-6 Acetone	1-(2,5-dihydroxyphenyl)propan-1-one	166.063	C9H10O3	45.384	169155344	49.5872	167.07	C9H10O3[H]	17612562
Acetone	Ct-6 Acetone	4-hydroxy-3-propionylphenyl acetate	208.074	C11H12O4	36.158	171971664	50.4128	209.081	C11H12O4[H]	18936324
DMSO	Ct-6 DMSO	1-(2,5-dihydroxyphenyl)propan-1-one	166.063	C9H10O3	45.651	5558872	7.6092	167.07	C9H10O3[H]	3432636
DMSO	Ct-6 DMSO	4-hydroxy-3-propionylphenyl acetate	208.074	C11H12O4	36.37	62490880	85.5399	209.081	C11H12O4[H]	12522505
DMSO	Ct-6 DMSO				45.167	5004880	6.85087	167.07	C9H10O3[H]	35367
	Ct-7	5-methylbenzene-1,3-diol	124.052	C7H8O2	46.304	23653970		125.06	C7H8O2[H]	6685594
MeOH	Ct-7 MeOH	5-methylbenzene-1,3-diol	124.052	C7H8O2	46.261	1735121	100	125.06	C7H8O2[H]	504558
MeOH	Ct-7 MeOH	3-hydroxy-5-methylphenyl acetate	166.063	C9H10O3	NA		0
MeOH	Ct-7 MeOH	5-methyl-1,3-phenylene diacetate	208.074	C11H12O4	NA		0
Acetone	Ct-7 Acetone	5-methylbenzene-1,3-diol	124.052	C7H8O2	45.943	137436944	64.8571	125.06	C7H8O2[H]	20318244
Acetone	Ct-7 Acetone	3-hydroxy-5-methylphenyl acetate	166.063	C9H10O3	41.821	55978520	26.4165	125.06	C7H8O2[H]	15392204
Acetone	Ct-7 Acetone	5-methyl-1,3-phenylene diacetate	208.074	C11H12O4	34.263	18492020	8.72646	167.07	C9H10O3[H]	5363440
DMSO	Ct-7 DMSO	5-methylbenzene-1,3-diol	124.052	C7H8O2	45.923	26475778	50.627	125.06	C7H8O2[H]	2931288
DMSO	Ct-7 DMSO	3-hydroxy-5-methylphenyl acetate	166.063	C9H10O3	41.906	17213888	32.9164	125.06	C7H8O2[H]	2184124
DMSO	Ct-7 DMSO	5-methyl-1,3-phenylene diacetate	208.074	C11H12O4	34.346	4000898	7.65052	167.07	C9H10O3[H]	539682
DMSO	Ct-7 DMSO				44.897	4605195	8.80606	179.07	C10H10O3[H]	1430580
	Ct-8	pyrocatechol	110.037	C6H6O2	39.445	10875300		111.044	C6H6O2[H]	2783090
MeOH	Ct-8 MeOh	pyrocatechol	110.037	C6H6O2	39.429	16801922	95.3705	111.044	C6H6O2[H]	139140
MeOH	Ct-8 MeOh	2-hydroxyphenyl acetate	152.047	C8H8O3	NA	815610	4.62954	153.054	C8H8O3[H]	407900
Acetone	Ct-8 Acetone	pyrocatechol	110.037	C6H6O2	39.432	9996176	35.8929	111.044	C6H6O2[H]	2887454
Acetone	Ct-8 Acetone	2-hydroxyphenyl acetate	152.047	C8H8O3	34.373	10745267	38.5826	153.054	C8H8O3[H]	3458416
Acetone	Ct-8 Acetone	1,2-phenylene diacetate	194.058	C10H10O4	31.463	7108592	25.5245	153.054	C8H8O3[H]	1970342
DMSO	Ct-8 DMSO	pyrocatechol	110.037	C6H6O2	39.335	246368	7.1851	111.044	C6H6O2[H]	436626
DMSO	Ct-8 DMSO	1,2-phenylene diacetate	194.058	C10H10O4	31.463	2306432	67.265	153.054	C8H8O3[H]	1917796
DMSO	Ct-8 DMSO	2-hydroxyphenyl acetate	152.047	C8H8O3	34.268	608427	17.7442	153.054	C8H8O3[H]	782642
DMSO	Ct-8 DMSO				24.219	267646	7.80566	137.023	C7H4O3[H]	80950
	Ox-9	ethyl 2-hydroxybenzoate	166.063	C9H10O3	23.979	113215		167.07	C9H10O3[H]	45116
MeOH	Ox-9 MeOH	ethyl 2-hydroxybenzoate	166.063	C9H10O3	23.959	101567688	99.7744	167.071	C9H10O3[H]	20319606
MeOH	Ox-9 MeOH	ethyl 2-acetoxybenzoate	208.074	C11H12O4	32.336	229620	0.225566	167.07	C9H10O3[H]	62232
Acetone	Ox-9 Acetone	ethyl 2-hydroxybenzoate	166.063	C9H10O3	23.751	63069184	65.86	167.077	C9H10O3[H]	20187298
Acetone	Ox-9 Acetone	ethyl 2-acetoxybenzoate	208.074	C11H12O4	32.089	32693348	34.14	167.07	C9H10O3[H]	25758
DMSO	Ox-9 DMSO	ethyl 2-hydroxybenzoate	166.063	C9H10O3	23.732	216811248	40.1711	167.07	C9H10O3[H]	18213416
DMSO	Ox-9 DMSO	ethyl 2-acetoxybenzoate	208.074	C11H12O4	32.058	97282672	18.0247	167.07	C9H10O3[H]	16682060
DMSO	Ox-9 DMSO				31.64	9631622	1.78456	179.07	C10H10O3[H]	2237396
DMSO	Ox-9 DMSO				37.04	178440432	33.0617	179.07	C10H10O3[H]	18522632
DMSO	Ox-9 DMSO				37.364	23144786	4.2883	179.07	C10H10O3[H]	4455333
DMSO	Ox-9 DMSO				37.64	14408365	2.6696	227.073	C11H14O3S[H]	3530573
	Ox-10	1-(3-hydroxy-4-methoxyphenyl)ethan-1-one	166.063	C9H10O3	41.028	90541264		167.07	C9H10O3[H]	20276616
MeOH	Ox-10 MeOH	1-(3-hydroxy-4-methoxyphenyl)ethan-1-one	166.063	C9H10O3	41.017	94197520	98.0552	167.071	C9H10O3[H]	20030954
MeOH	Ox-10 MeOH	5-acetyl-2-methoxyphenyl acetate	208.074	C11H12O4	40.173	1868322	1.94483	209.081	C11H12O4[H]	713234
Acetone	Ox-10 Acetone	1-(3-hydroxy-4-methoxyphenyl)ethan-1-one	166.063	C9H10O3	40.714	149457008	47.4352	167.07	C9H10O3[H]	18293838
Acetone	Ox-10 Acetone	5-acetyl-2-methoxyphenyl acetate	208.074	C11H12O4	39.921	165619152	52.5648	209.081	C11H12O4[H]	19006398
DMSO	Ox-10 DMSO	1-(3-hydroxy-4-methoxyphenyl)ethan-1-one	166.063	C9H10O3	39.84	113349624	31.7372	167.071	C9H10O3[H]	372856
DMSO	Ox-10 DMSO	5-acetyl-2-methoxyphenyl acetate	208.074	C11H12O4	40.672	83494336	23.3779	209.081	C11H12O4[H]	1348246
DMSO	Ox-10 DMSO				48.453	60506668	16.9415	227.073	C11H14O3S[H]	58396
DMSO	Ox-10 DMSO				51.971	99799640	27.9433	227.073	C11H14O3S[H]	58396
	Ox-11	3-ethoxy-4-hydroxybenzaldehyde	166.063	C9H10O3	38.743	93049336		167.07	C9H10O3[H]	20040432
MeOH	Ox-11 MeOH	3-ethoxy-4-hydroxybenzaldehyde	166.063	C9H10O3	36.875	3101875	100	167.07	C9H10O3[H]	1058134
MeOH	Ox-11 MeOH	2-ethoxy-4-formylphenyl acetate	208.074	C11H12O4	NA		0
Acetone	Ox-11 Acetone	3-ethoxy-4-hydroxybenzaldehyde	166.063	C9H10O3	36.606	136051936	55.3948	167.07	C9H10O3[H]	20331086
Acetone	Ox-11 Acetone	2-ethoxy-4-formylphenyl acetate	208.074	C11H12O4	36.063	109552088	44.6052	167.07	C9H10O3[H]	18870216
DMSO	Ox-11 DMSO	3-ethoxy-4-hydroxybenzaldehyde	166.063	C9H10O3	36.562	117854488	47.6384	167.07	C9H10O3[H]	758134
DMSO	Ox-11 DMSO	2-ethoxy-4-formylphenyl acetate	208.074	C11H12O4	36.016	117937136	47.6718	167.07	C9H10O3[H]	1587320
DMSO	Ox-11 DMSO				41.603	3443242	1.39181	227.073	C11H14O3S[H]	39990
DMSO	Ox-11 DMSO				47.142	8159004	3.29798	227.074	C11H14O3S[H]	35118
	Ox-12	4-hydroxy-3-methoxybenzaldehyde	152.047	C8H8O3	37.558	73122376		153.055	C8H8O3[H]	19543476
MeOH	Ox-12 MeOH	4-hydroxy-3-methoxybenzaldehyde	152.047	C8H8O3	37.52	2550932	100	153.054	C8H8O3[H]	874112
MeOH	Ox-12 MeOH	4-formyl-2-methoxyphenyl acetate	194.058	C10H10O4	NA		0
Acetone	Ox-12 Acetone	4-hydroxy-3-methoxybenzaldehyde	152.047	C8H8O3	37.255	106624704	54.139	153.054	C8H8O3[H]	17514320
Acetone	Ox-12 Acetone	4-formyl-2-methoxyphenyl acetate	194.058	C10H10O4	36.318	90321360	45.861	153.054	C8H8O3[H]	18596290
DMSO	Ox-12 DMSO	4-hydroxy-3-methoxybenzaldehyde	152.047	C8H8O3	37.206	103387272	51.9522	153.055	C8H8O3[H]	608990
DMSO	Ox-12 DMSO	4-formyl-2-methoxyphenyl acetate	194.058	C10H10O4	36.268	95617288	48.0478	153.055	C8H8O3[H]	897396
	Ol-13	3-(hydroxymethyl)phenol	124.052	C7H8O2	43.718	2315982		124.052	C7H8O2	762578
MeOH	Ol-13 MeOH	3-(hydroxymethyl)phenol	124.052	C7H8O2	43.692	3332165	99.8141	124.052	C7H8O2	1266984
MeOH	Ol-13 MeOH	3-(hydroxymethyl)phenyl acetate	166.063	C9H10O3	38.296	6206.3	0.185908	149.06	C9H8O2[H]	2384
Acetone	Ol-13 Acetone	3-(hydroxymethyl)phenol	124.052	C7H8O2	43.373	33822568	19.8336	124.052	C7H8O2	27333550
Acetone	Ol-13 Acetone	3-(hydroxymethyl)phenyl acetate	166.063	C9H10O3	37.988	81567432	47.8313	149.06	C9H8O2[H]	15263597
Acetone	Ol-13 Acetone	3-acetoxybenzyl acetate	208.074	C11H12O4	34.643	40198508	23.5725	149.06	C9H8O2[H]	8926939
Acetone	Ol-13 Acetone	3-hydroxybenzyl acetate	166.063	C9H10O3	41.819	14942938	8.76257	107.049	C7H6O[H]	2475437
DMSO	Ol-13 DMSO	3-(hydroxymethyl)phenol	124.052	C7H8O2	NA		0
DMSO	Ol-13 DMSO	3-(hydroxymethyl)phenyl acetate	166.063	C9H10O3	38.217	1182.6	0.0225183	149.059	C9H8O2[H]	440
DMSO	Ol-13 DMSO				31.298	4.40718e+06	83.9187	165.055	C9H8O3[H]	1369720
DMSO	Ol-13 DMSO				38.832	83612.5	1.59209	137.059	C8H8O2[H]	33148
DMSO	Ol-13 DMSO				40.803	369372	7.03333	123.044	C7H6O2[H]	105448
DMSO	Ol-13 DMSO				44.489	131740	2.50851	183.047	C9H10O2S[H]	62472
DMSO	Ol-13 DMSO				48.349	258642	4.92489	183.047	C9H10O2S[H]	75256
	Ol-14	chroman-4-ol	150.068	C9H10O2	34.191	66419924		133.065	C9H8O[H]	15878998
MeOH	Ol-14 MeOH	chroman-4-ol	150.068	C9H10O2	34.16	63632596	100	133.065	C9H8O[H]	15969728
MeOH	Ol-14 MeOH	chroman-4-yl acetate	192.079	C11H12O3	NA		0
Acetone	Ol-14 Acetone	chroman-4-ol	150.068	C9H10O2	33.899	192152864	99.4432	133.065	C9H8O[H]	20330376
Acetone	Ol-14 Acetone	chroman-4-yl acetate	192.079	C11H12O3	31.484	1075853	0.556777	133.065	C9H8O[H]	4110812
DMSO	Ol-14 DMSO	chroman-4-ol	150.068	C9H10O2	NA		0
DMSO	Ol-14 DMSO	chroman-4-yl acetate	192.079	C11H12O3	NA		0
DMSO	Ol-14 DMSO				30.351	8746974	98.6079	149.06	C9H8O2[H]	2304260
DMSO	Ol-14 DMSO				36.863	123489	1.39214	133.067	C9H8O[H]	38462
	Ol-15	1-phenylethan-1-ol	122.073	C8H10O	23.982	16064919		121.065	C8H8O[H]	2553650
MeOH	Ol-15 MeOH	1-phenylethan-1-ol	122.073	C8H10O	23.71	124924368	99.9759	121.065	C8H8O[H]	9480074
MeOH	Ol-15 MeOH	1-phenylethyl acetate	164.084	C10H12O2	23.338	30140	0.0241208	105.07	C8H8[H]	448154
Acetone	Ol-15 Acetone	1-phenylethan-1-ol	122.073	C8H10O	23.885	534005	100	121.065	C8H8O[H]	82252
Acetone	Ol-15 Acetone	1-phenylethyl acetate	164.084	C10H12O2	NA		0
DMSO	Ol-15 DMSO	1-phenylethan-1-ol	122.073	C8H10O	NA		0
DMSO	Ol-15 DMSO	1-phenylethyl acetate	164.084	C10H12O2	NA		0
DMSO	Ol-15 DMSO				20.426	3246140	98.5683	121.065	C8H8O[H]	682922
DMSO	Ol-15 DMSO				24.724	47150	1.4317	121.065	C8H8O[H]	10506
	Ol-16	2-phenylethan-1-ol	122.073	C8H10O	25.973	8738593		121.065	C8H8O[H]	490014
MeOH	Ol-16 MeOH	2-phenylethan-1-ol	122.073	C8H10O	25.661	5312326	100	121.066	C8H8O[H]	386928
MeOH	Ol-16 MeOH	phenethyl acetate	164.084	C10H12O2	NA		0
Acetone	Ol-16 Acetone	2-phenylethan-1-ol	122.073	C8H10O	25.708	92059584	96.5402	121.065	C8H8O[H]	24502
Acetone	Ol-16 Acetone	phenethyl acetate	164.084	C10H12O2	23.803	3299212	3.45979	105.07	C8H8[H]	3340812
DMSO	Ol-16 DMSO	2-phenylethan-1-ol	122.073	C8H10O	25.849	8165.7	0.296956	121.065	C8H8O[H]	2374
DMSO	Ol-16 DMSO	phenethyl acetate	164.084	C10H12O2	NA		0
DMSO	Ol-16 DMSO				20.222	89180.9	3.24317	121.065	C8H8O[H]	20510
DMSO	Ol-16 DMSO				26.761	1.46062e+06	53.1172	163.076	C10H10O2[H]	50994
DMSO	Ol-16 DMSO				27.299	466383	16.9606	163.076	C10H10O2[H]	158830
DMSO	Ol-16 DMSO				28.369	725456	26.3821	135.08	C9H10O[H]	229022
	Ol-17	3-cyclohexylpropan-1-ol	142.136	C9H18O	23.442	13432961		141.127	C9H16O[H]	2350282
MeOH	Ol-7 MeOh	3-cyclohexylpropan-1-ol	142.136	C9H18O	23.4	521163	100	141.127	C9H16O[H]	159764
MeOH	Ol-7 MeOh	3-cyclohexylpropyl acetate	184.146	C11H20O2	NA		0
Acetone	Ol-17 Acetone	3-cyclohexylpropan-1-ol	142.136	C9H18O	23.323	267542	97.0581	141.128	C9H16O[H]	69554
Acetone	Ol-17 Acetone	3-cyclohexylpropyl acetate	184.146	C11H20O2	21.414	8109.5	2.94194	125.133	C9H16[H]	5846
DMSO	Ol-17 DMSO	3-cyclohexylpropan-1-ol	142.136	C9H18O	23.336	83466.9	3.11488	141.128	C9H16O[H]	21092
DMSO	Ol-17 DMSO	3-cyclohexylpropyl acetate	184.146	C11H20O2	21.419	3351.6	0.125077	125.133	C9H16[H]	2260
DMSO	Ol-17 DMSO				17.166	1203158	44.9003	141.128	C9H16O[H]	166948
DMSO	Ol-17 DMSO				25.764	1.34758e+06	50.2897	155.143	C10H18O[H]	401338
DMSO	Ol-17 DMSO				27.499	42070.9	1.57003	155.143	C10H18O[H]	8316
	CA-18	2-hydroxy-3-phenylpropanoic acid	166.063	C9H10O3	26.016	1311272		123.081	C8H10O[H]	460152
	CA-18	methyl 2-hydroxy-3-phenylpropanoate	180.079	C10H12O3	32.592	311097		181.086	C10H12O3[H]	139986
MeOH	CA-18 MeOH	2-hydroxy-3-phenylpropanoic acid	166.063	C9H10O3	25.97	1186780	51.0758	123.081	C8H10O[H]	417678
MeOH	CA-18 MeOH	methyl 2-hydroxy-3-phenylpropanoate	180.079	C10H12O3	32.558	1102977	47.4692	181.086	C10H12O3[H]	361346
MeOH	CA-18 MeOH	2-acetoxy-3-phenylpropanoic acid	208.074	C11H12O4	NA		0
MeOH	CA-18 MeOH	methyl 2-acetoxy-3-phenylpropanoate	222.089	C12H14O4	32.552	33808	1.45501	181.086	C10H12O3[H]	361346
Acetone	CA-18 Acetone	2-hydroxy-3-phenylpropanoic acid	166.063	C9H10O3	25.704	27250668	69.1003	123.081	C8H10O[H]	4201580
Acetone	CA-18 Acetone	methyl 2-hydroxy-3-phenylpropanoate	180.079	C10H12O3	32.275	2356817	5.97625	181.087	C10H12O3[H]	498167
Acetone	CA-18 Acetone	2-acetoxy-3-phenylpropanoic acid	208.074	C11H12O4			0
Acetone	CA-18 Acetone	methyl 2-acetoxy-3-phenylpropanoate	222.089	C12H14O4	32.302	9828885	24.9234	163.074	C10H10O2[H]	5370720
DMSO	CA-18 DMSO	2-hydroxy-3-phenylpropanoic acid	166.063	C9H10O3	NA		0
DMSO	CA-18 DMSO	methyl 2-hydroxy-3-phenylpropanoate	180.079	C10H12O3	32.51	22595	0.27852	163.075	C10H10O2[H]	10058
DMSO	CA-18 DMSO	2-acetoxy-3-phenylpropanoic acid	208.074	C11H12O4			0
DMSO	CA-18 DMSO	methyl 2-acetoxy-3-phenylpropanoate	222.089	C12H14O4	32.51	1113835	13.7298	163.075	C10H10O2[H]	10058
DMSO	CA-18 DMSO				22.804	2146596	26.4603	151.075	C9H10O2[H]	18902
DMSO	CA-18 DMSO				31.63	946608	11.6685	149.06	C9H8O2[H]	8332
DMSO	CA-18 DMSO				32.099	2159576	26.6203	179.07	C10H10O3[H]	9880
DMSO	CA-18 DMSO				33.907	1723301	21.2425	133.065	C9H8O[H]	8900
	CA-19	2-(4-hydroxyphenyl)propanoic acid	166.063	C9H10O3	34.824	112539		121.065	C8H8O[H]	67804
MeOH	CA-19 MeOH	2-(4-hydroxyphenyl)propanoic acid	166.063	C9H10O3	34.803	106846	0.781305	121.066	C8H8O[H]	69850
MeOH	CA-19 MeOH	methyl 2-(4-hydroxyphenyl)propanoate	180.079	C10H12O3	41.888	13358959	97.6866	181.086	C10H12O3[H]	4508694
MeOH	CA-19 MeOH	2-(4-acetoxyphenyl)propanoic acid	208.074	C11H12O4	NA		0
MeOH	CA-19 MeOH	methyl 2-(4-acetoxyphenyl)propanoate	222.089	C12H14O4	35.324	209513	1.53205	223.097	C12H14O4[H]	73926
Acetone	CA-19 Acetone	2-(4-hydroxyphenyl)propanoic acid	166.063	C9H10O3	34.699	44713	3.03118	121.065	C8H8O[H]	19904
Acetone	CA-19 Acetone	methyl 2-(4-hydroxyphenyl)propanoate	180.079	C10H12O3	41.784	1003679	68.0414	181.086	C10H12O3[H]	316508
Acetone	CA-19 Acetone	2-(4-acetoxyphenyl)propanoic acid	208.074	C11H12O4	NA		0
Acetone	CA-19 Acetone	methyl 2-(4-acetoxyphenyl)propanoate	222.089	C12H14O4	35.228	426709	28.9274	223.096	C12H14O4[H]	133650
DMSO	CA-19 DMSO	2-(4-hydroxyphenyl)propanoic acid	166.063	C9H10O3	34.599	728830	21.9359	121.065	C8H8O[H]	531364
DMSO	CA-19 DMSO	methyl 2-(4-hydroxyphenyl)propanoate	180.079	C10H12O3	41.687	1550104	46.6541	181.086	C10H12O3[H]	899294
DMSO	CA-19 DMSO	2-(4-acetoxyphenyl)propanoic acid	208.074	C11H12O4	NA	0	0
DMSO	CA-19 DMSO	methyl 2-(4-acetoxyphenyl)propanoate	222.089	C12H14O4	35.113	298964	8.99803	223.097	C12H14O4[H]	84550
DMSO	CA-19 DMSO				33.939	427845	12.877	133.065	C9H8O[H]	166370
					42.997	316806	9.53503	195.084	C11H14OS[H]	101438
	CA-20	4-hydroxy-3,5-dimethylbenzoic acid	166.063	C9H10O3	26.008	7133914		123.081	C8H10O1[H]	2472974
MeOH	CA-20 MeOH	4-hydroxy-3,5-dimethylbenzoic acid	166.063	C9H10O3	25.999	2263185	72.6811	123.081	C8H10O1[H]	820836
MeOH	CA-20 MeOH	methyl 4-hydroxy-3,5-dimethylbenzoate	180.079	C10H12O3	40.7	850672	27.3189	181.086	C10H12O3[H]	364978
MeOH	CA-20 MeOH	4-acetoxy-3,5-dimethylbenzoic acid	208.074	C11H12O4	NA		0
MeOH	CA-20 MeOH	methyl 4-acetoxy-3,5-dimethylbenzoate	222.089	C12H14O4	NA		0
Acetone	CA-20 Acetone	4-hydroxy-3,5-dimethylbenzoic acid	166.063	C9H10O3	25.705	30066272	27.2099	123.082	C8H10O1[H]	7015753
Acetone	CA-20 Acetone	methyl 4-hydroxy-3,5-dimethylbenzoate	180.079	C10H12O3	40.417	75396720	68.2339	181.086	C10H12O3[H]	324180
Acetone	CA-20 Acetone	4-acetoxy-3,5-dimethylbenzoic acid	208.074	C11H12O4	NA		0
Acetone	CA-20 Acetone	methyl 4-acetoxy-3,5-dimethylbenzoate	222.089	C12H14O4	35.214	5034392	4.55612	223.096	C12H14O4[H]	1332778
DMSO	CA-20 DMSO	4-hydroxy-3,5-dimethylbenzoic acid	166.063	C9H10O3	25.934	34666.3	3.92024	123.08	C8H10O1[H]	15750
DMSO	CA-20 DMSO	methyl 4-hydroxy-3,5-dimethylbenzoate	180.079	C10H12O3	40.648	44940.6	5.08211	181.086	C10H12O3[H]	25130
DMSO	CA-20 DMSO	4-acetoxy-3,5-dimethylbenzoic acid	208.074	C11H12O4	NA	0	0
DMSO	CA-20 DMSO	methyl 4-acetoxy-3,5-dimethylbenzoate	222.089	C12H14O4	35.435	14976.3	1.6936	223.096	C12H14O4[H]	6622
DMSO	CA-20 DMSO				27.731	8282	0.936571	137.096	C9H13O[H]
DMSO	CA-20 DMSO				39.35	676267	76.4758	135.08	C9H10O1[H]	222410
DMSO	CA-20 DMSO				40.434	19552.3	2.21107	241.089	C12H16O3S[H]	13492
DMSO	CA-20 DMSO				40.647	85605	9.68065	149.059	C9H8O2[H]	35270
